# Supplementary material for: Salivary Protein Cyclin-Dependent Kinase-like from Grain Aphid Sitobion avenae Suppresses Wheat Defense Response and Enhances Aphid Adaptation
Source: MDPI journal article supplement (doi:10.3390/ijms25094579), 2024-04-23
Supplement: s1 [file s1]

Table S1 Primers used in this study

| Primers             | Forward primer                                                 | Reverse primer                                                        | Use of primers     |
|---------------------|----------------------------------------------------------------|-----------------------------------------------------------------------|--------------------|
| SaCDK               | ATGAATAAGTACAGGGAGTTG<br>GG                                    | TCATGGAAATATATTTACTTG<br>GTATACACA                                    | cDNA               |
| SaCDK-sacI-<br>xbaI | cgagctcATGAATAAGTACAGGGA<br>GTTGGG                             | gctctagaTCATGGAAATATATTT<br>ACTTGGTATACACA                            | cloning            |
| attB-SaCDK          | ggggacaagtttgtacaaaaaagcaggcttc<br>ATGAATAAGTACAGGGAGTTG<br>GG | ggggaccactttgtacaagaaagctgggctcTC<br>ATGGAAATATATTTACTTGGT<br>ATACACA | Gateway<br>cloning |
| QSaCDK              | AGATACTGCGAGATGATGGT                                           | ATGGTGCCTGAATGCTTC                                                    | RT-qPCR            |
| PR1                 | AGTGCAAGTCCACCCTCATC                                           | CTTGGCCTTGGTGATCTCAT                                                  |                    |
| PAL                 | CCACCCTGGACAGATTGAA                                            | ATGAGCGGGTTGTCGTTG                                                    |                    |
| FAD                 | TCCATTCCACCTACTGC                                              | GGACTCACCAATCCGAGA                                                    |                    |
| LOX                 | GACCAGCGAAACAACAACC                                            | GCATACAATAGCGGGAACAC                                                  |                    |
| $\beta$ -actin      | GGAAAATCAGTCTCGGTTTCAG                                         | TCATACAGCAGGCAAGCAC                                                   |                    |
| NADH                | TTAACGGTATAGATGATCAGCA                                         | CGAGGAGAACATGCTCTTAGA<br>C                                            |                    |
